# Supplementary material for: Beyond Taxonomic Analysis of Microbiomes: A Functional Approach for Revisiting Microbiome Changes in Colorectal Cancer
Source: Front Microbiol. 2020 Jan 23;10:3117. doi: 10.3389/fmicb.2019.03117 (PMC6990412; doi:10.3389/fmicb.2019.03117)
Supplement: TABLE S3 — Statistical information on the number of reads in samples mapped to the gene catalog using the MOSAIK tool. [file Table_3.xlsx]

## Sheet: Mosaik Result
* Unique mapped paired reads: Both pairs of reads are mapped to one gene **Multi mapped paired reads: One pair of reads is mapped to a gene and the other read is mapped to another gene, or no gene is mapped. ***Not mapped paired reads: No pair of reads have been mapped to any gene
Mosaik Result
sampels name	Total paired reads	Unique mapped paired reads*	Multi mapped paired reads**	Not mapped paired reads***	mapped reads for each sample	mapped reads/(2*total paired reads)
SERR688505	20056458	13100727	6374068	581663	35308758	0.880234
SERR688506	32474886	19514833	10849035	2111018	53391840	0.822048
SERR688507	29839288	19824470	8088333	1926485	51703823	0.866372
SERR688508	24748494	16394421	6536557	1817516	42672260	0.862118
SERR688509	25513317	17174354	6551393	1787570	44095455	0.864165
SERR688510	24762672	15242723	6651460	2868489	40245421	0.812623
SERR688511	19835598	13310051	4953529	1572018	34209700	0.862331
SERR688512	32109723	20510265	8920999	2678459	53790710	0.837608
SERR688513	26382550	17728405	7068535	1585610	46227790	0.876105
SERR688514	24050022	14962992	6121868	2965162	38677001	0.804095
SERR688515	25837477	14652740	8130973	3053764	40719392	0.787991
SERR688516	21177564	14440441	4931755	1805368	36372773	0.858757
SERR688517	25516040	15311448	5000864	5203728	38587256	0.756137
SERR688518	24213175	16399149	6171557	1642469	42125581	0.86989
SERR688519	30352133	20302372	7991265	2058496	52439312	0.863849
SERR688520	22844950	15503787	5609697	1731466	39474676	0.863969
SERR688521	26617685	16767509	7857737	1992439	45227608	0.849578
SERR688522	27200088	17845602	7262199	2092287	46563662	0.855947
SERR688523	25384083	16442533	6514703	2426847	42322206	0.833637
SERR688524	21724739	14036575	4944572	2743592	35050910	0.806705
SERR688525	23424383	13997177	6544878	2882328	37506168	0.80058
SERR688526	28420748	19349484	7433390	1637874	49771280	0.875615
SERR688527	29927254	18150546	8774929	3001779	48982685	0.818363
SERR688528	28603351	18644196	6661649	3297506	46478119	0.812459
SERR688529	28854500	19621223	6915179	2318098	49181157	0.852227
SERR688530	27980088	19164720	6871863	1943505	48413437	0.865141
SERR688531	20260031	13867250	4917842	1474939	35365494	0.87279
SERR688532	22703007	15422956	5380601	1899450	39018989	0.859335
SERR688533	26484125	18160356	6497910	1825859	46061338	0.869603
SERR688534	31308192	21060478	8461363	1786351	54930462	0.877254
SERR688535	31034101	20998686	7889572	2145843	53589230	0.863393
SERR688536	29934929	19531863	8180565	2222501	51220641	0.855533
SERR688537	29365450	18769446	7532763	3063241	48597038	0.827453
SERR688538	33467260	21756414	9716467	1994379	58182424	0.869244
SERR688539	29307692	18901212	8263638	2142842	50053493	0.853931
SERR688540	19688087	13456304	4560614	1671169	33888515	0.860635
SERR688541	31580158	20373651	9214047	1992460	54316245	0.859974
SERR688542	33080606	21610540	9612572	1857494	57594276	0.870514
SERR688543	19512735	13194156	4882798	1435781	33907541	0.868857
SERR688544	25741116	16951284	6721009	2068823	43892241	0.852571
SERR688545	24247347	15176392	6789888	2281067	40403196	0.833147
SERR688546	29200249	18313527	7527616	3359106	47578469	0.814693
SERR688547	23261680	14544678	5985314	2731688	38100976	0.818964
SERR688548	29363386	18945783	8205341	2212262	50239439	0.855478
SERR688549	39170675	24232500	11495724	3442451	64969872	0.829318
SERR688550	23763998	16491170	5633981	1638847	41567905	0.874598
SERR688551	23118858	14014397	6763392	2341069	38240483	0.827041
SERR688552	24414011	16064629	6127331	2222051	41418554	0.848254
SERR688553	27886772	16630904	7008751	4247117	43440129	0.778866
SERR688554	27144355	18030335	7070276	2043744	46529270	0.857071
SERR688555	25258683	16662531	6147789	2448363	42359740	0.838518
SERR688556	21976389	14177432	5467128	2331829	36503012	0.830505
SERR688557	21517664	13924403	6072520	1520741	37407363	0.869225
SERR688558	24446743	15318088	6084759	3043896	39399329	0.80582
SERR688559	32818713	22387808	7416716	3014189	55187261	0.84079
SERR688560	29190565	19257901	7870121	2062543	50550724	0.865874
SERR688561	25549375	16562016	7464364	1522995	44580191	0.872432
SERR688562	29099906	19346554	8233458	1519894	51219315	0.88006
SERR688563	24787138	16402973	6400994	1983171	42531767	0.85794
SERR688564	29786700	19863219	6287155	3636326	48489683	0.813949
SERR688565	27165858	17409455	6469225	3287178	43979334	0.80946
SERR688566	19453783	13346342	4711025	1396416	34105602	0.87658
SERR688567	23197613	14934169	6181090	2082354	39104117	0.842848
SERR688568	19520755	12473865	5228554	1818336	33016702	0.845682
SERR688569	31222562	20126072	8103557	2992933	51695801	0.82786
SERR688570	22124801	13700267	6093234	2331300	36685223	0.829052
SERR688571	29360386	18275936	8608444	2476006	49622418	0.845057
SERR688572	32431127	20194271	10123163	2113693	55484523	0.855421
SERR688573	27671795	18119996	7301722	2250077	47009640	0.849414
SERR688574	27911137	17122555	7959503	2829079	45709699	0.818843
SERR688575	30227502	19549477	8259994	2418031	50850957	0.841137
SERR688576	29991991	19765009	8045828	2181154	51202521	0.853603
SERR688577	28686450	18552536	7859298	2274616	48444640	0.844382
SERR688578	27061552	17918527	6681766	2461259	45463742	0.840006
SERR688579	25170549	15559363	7450129	2161057	41824067	0.830814
SERR688580	27416746	17932627	7094244	2389875	46458984	0.847274
SERR688581	30717938	19010643	8735776	2971519	50750172	0.826067
SERR688582	33201178	13280738	15028781	4891659	47673101	0.717943
SERR688583	36202656	21545383	12040106	2617167	60699861	0.838334
SERR688584	24845692	16575732	6773527	1496433	43488517	0.875172
SERR688585	23642060	14741123	6353659	2547278	38870484	0.822062
SERR688586	25396770	17133888	6028898	2233984	43041710	0.847386
SERR688587	28903806	18548408	8579806	1775592	50063470	0.866036
SERR688588	21552865	14871554	5376007	1305304	38114053	0.884199
SERR688589	30396280	19325410	7830184	3240686	49806563	0.819287
SERR688590	20201402	12415487	5314717	2471198	32649589	0.808102
SERR688591	21204955	14495731	5249712	1459512	37053321	0.873695
SERR688592	31432413	20303770	8205051	2923592	52414139	0.833759
SERR688593	21987677	15184192	5095807	1707678	37994940	0.864005
SERR688594	21835542	15114310	5295966	1425266	38405461	0.879425
SERR688595	22482098	15324379	5687091	1470628	39242661	0.872754
SERR688596	28090317	19137048	6883624	2069645	48675520	0.866411
SERR688597	29834475	19619059	7921593	2293823	50551930	0.847207
SERR688598	28370594	18328783	7801729	2240082	47793471	0.842306
SERR688599	26625167	17392889	6782080	2450198	44248087	0.830945
SERR688600	23383277	12887502	7794393	2701382	35519957	0.759516
SERR688601	27311801	17022067	8402664	1887070	46289277	0.847423
SERR688602	24640465	16408001	6716824	1515640	43254203	0.877707
SERR688603	24780764	16112812	6570402	2097550	41354657	0.83441
SERR688604	26145505	16778211	7168439	2198855	43806328	0.837741
SERR688605	20578474	13680001	5015738	1882735	34361415	0.834887
SERR688606	27786037	16713679	8994240	2078118	45467328	0.818169
SERR688607	19278860	12328565	5150147	1800148	31299475	0.811756
SERR688608	23631423	15467234	6095020	2069169	39995808	0.846242
SERR688609	15513169	10366467	3240899	1905803	24618989	0.793487
SERR688610	28554120	17691537	6981129	3881454	42870199	0.750683
SERR688611	27641168	17601369	7637265	2402534	46149090	0.834789
SERR688612	20163192	13281305	5292362	1589525	34745179	0.861599
SERR688613	30930120	19933427	7993919	3002774	51415459	0.831155
SERR688614	22585513	6491793	12039584	4054136	34913824	0.772925
SERR688615	27309966	18279274	7115537	1915155	47008519	0.860648
SERR688616	21617085	15887160	4192764	1537161	38929367	0.900431
SERR688617	20561125	14066072	4960991	1534062	35434966	0.861698
SERR688618	25369054	15659525	6470116	3239413	39381282	0.776168
SERR688619	32723661	21736150	8450926	2536585	55401736	0.846509
SERR688620	29108157	19926999	7627628	1553530	52332621	0.898934
SERR688621	29416034	18552846	8600593	2262595	49408858	0.839829
SERR688622	24583040	15162955	6729319	2690766	39781296	0.809121
SERR688623	26376787	16421796	6941743	3013248	42509706	0.805817
SERR688624	30665000	19815285	6624333	4225382	49334808	0.804416
SERR688625	28622644	19448723	7306011	1867910	49542192	0.865437
SERR688626	28239602	18645533	6799383	2794686	48804959	0.864123
SERR688627	25003391	17021082	5810325	2171984	42361873	0.847123
SERR688628	31289052	20454444	8947766	1886842	54275463	0.867324
SERR688629	23059238	15264584	5800307	1994347	39259178	0.851268
SERR688630	25433150	16419137	6542371	2471642	41726569	0.820319
SERR688631	21096804	14396558	5185851	1514395	36777071	0.871627
SERR688632	30084053	19990209	7822330	2271514	51585932	0.857363
SERR688633	32710495	21530899	8930493	2249103	55739435	0.852011
SERR688634	29017379	17740557	8426225	2850597	47456705	0.817729
SERR688635	22537125	14495002	5178068	2864055	36115956	0.801255
SERR688636	28120088	18475993	7768720	1875375	48490935	0.862212
SERR688637	30100955	20427753	7836594	1836608	52260236	0.868083
SERR688638	36858391	23122056	11470370	2265965	63596297	0.862711
SERR688639	25919573	17413684	6517523	1988366	44588910	0.86014
SERR688640	28651553	15810007	7905473	4936073	42608548	0.743564
SERR688641	28467172	18269235	7952083	2245854	48094902	0.844743
SERR688642	31804185	19273572	9357850	3172763	52259240	0.821578
SERR688643	24539947	15348926	7396991	1794030	41729941	0.850245
SERR688644	23237641	15596486	5281765	2359390	38820508	0.835294
SERR688645	31902304	19500064	9325110	3077130	52129721	0.817021
SERR688646	26879103	18307546	6694994	1876563	46500072	0.864986
SERR688647	26712989	17563954	6982416	2166619	45316102	0.848204
SERR688648	23309322	16524750	5426698	1357874	41619241	0.89276
SERR688649	24786392	16146806	6565723	2073863	41902333	0.845269
SERR688650	33015193	21010545	10216159	1788489	57275023	0.867404
SERR688651	21302038	13040824	5420169	2841045	33915412	0.79606
SERR710424	24210213	14756877	7218642	2234694	40044320	0.827013
SERR710425	19073795	12013821	5559122	1500852	32754306	0.858621
SERR710426	23997592	15079715	6572511	2345366	39814437	0.829551
SERR710427	27127751	16195777	8193224	2738750	44008181	0.811128
SERR710428	25133862	15760210	7430169	1943483	42593782	0.847339
SERR710429	20376523	12611742	5840989	1923792	34097122	0.836677
SERR710430	17301869	10610077	4825094	1866698	28886934	0.834792
SERR710431	20792951	12957692	6105217	1730042	35200706	0.846458
SERR710432	25550387	15944367	7162990	2443030	42181002	0.825447
sum	4109778973	2641564812	1109354957	358859204	6912986496	0.841041
