# Supplementary material for: Beyond Taxonomic Analysis of Microbiomes: A Functional Approach for Revisiting Microbiome Changes in Colorectal Cancer
Source: Front Microbiol. 2020 Jan 23;10:3117. doi: 10.3389/fmicb.2019.03117 (PMC6990412; doi:10.3389/fmicb.2019.03117)
Supplement: TABLE S5 — The annotated reaction associated with each EC number obtained from the KEGG database. [file Table_5.xlsx]

## Sheet: Sheet1
EC number and related Reactions extracted from KEGG
EC:1.1.1.1	R00623
EC:1.1.1.1	R00624
EC:1.1.1.10	R01904
EC:1.1.1.100	R02767
EC:1.1.1.101	R03357
EC:1.1.1.102	R02978
EC:1.1.1.103	R01465
EC:1.1.1.107	R01707
EC:1.1.1.108	R02395
EC:1.1.1.11	R05604
EC:1.1.1.120	R01096
EC:1.1.1.122	R07148
EC:1.1.1.127	R01542
EC:1.1.1.130	R02637
EC:1.1.1.130	R02639
EC:1.1.1.132	R00880
EC:1.1.1.133	R02777
EC:1.1.1.135	R03396
EC:1.1.1.135	R03398
EC:1.1.1.136	R00421
EC:1.1.1.137	R01524
EC:1.1.1.137	R01525
EC:1.1.1.14	R07145
EC:1.1.1.140	R07133
EC:1.1.1.141	R02580
EC:1.1.1.145	R03176
EC:1.1.1.146	R03203
EC:1.1.1.149	R03325
EC:1.1.1.153	R02975
EC:1.1.1.153	R08208
EC:1.1.1.156	R01039
EC:1.1.1.157	R01976
EC:1.1.1.159	R02792
EC:1.1.1.16	R02928
EC:1.1.1.163	R02553
EC:1.1.1.169	R02472
EC:1.1.1.17	R00758
EC:1.1.1.170	R04483
EC:1.1.1.170	R07149
EC:1.1.1.173	R03942
EC:1.1.1.175	R01429
EC:1.1.1.178	R04203
EC:1.1.1.179	R01430
EC:1.1.1.18	R01183
EC:1.1.1.181	R04263
EC:1.1.1.184	R03557
EC:1.1.1.188	R02684
EC:1.1.1.189	R02581
EC:1.1.1.193	R03458
EC:1.1.1.195	R03054
EC:1.1.1.197	R04552
EC:1.1.1.2	R07328
EC:1.1.1.202	R03119
EC:1.1.1.203	R10841
EC:1.1.1.203	R10842
EC:1.1.1.205	R01130
EC:1.1.1.206	R02832
EC:1.1.1.207	R02177
EC:1.1.1.208	R02548
EC:1.1.1.21	R02819
EC:1.1.1.21	R02820
EC:1.1.1.211	R01778
EC:1.1.1.213	R10422
EC:1.1.1.213	R10423
EC:1.1.1.215	R01739
EC:1.1.1.216	R03264
EC:1.1.1.219	R11500
EC:1.1.1.22	R00286
EC:1.1.1.225	R03716
EC:1.1.1.23	R01158
EC:1.1.1.234	R03827
EC:1.1.1.239	R01836
EC:1.1.1.24	R01872
EC:1.1.1.243	R03114
EC:1.1.1.245	R02229
EC:1.1.1.25	R02413
EC:1.1.1.251	R05571
EC:1.1.1.252	R02906
EC:1.1.1.26	R00717
EC:1.1.1.261	R05679
EC:1.1.1.261	R05680
EC:1.1.1.262	R05681
EC:1.1.1.262	R05837
EC:1.1.1.262	R07406
EC:1.1.1.263	R05682
EC:1.1.1.264	R05683
EC:1.1.1.264	R05684
EC:1.1.1.267	R05688
EC:1.1.1.27	R00703
EC:1.1.1.270	R05691
EC:1.1.1.271	R05692
EC:1.1.1.272	R10528
EC:1.1.1.276	R06126
EC:1.1.1.276	R06830
EC:1.1.1.276	R10984
EC:1.1.1.28	R00704
EC:1.1.1.281	R03397
EC:1.1.1.281	R03399
EC:1.1.1.282	R01872
EC:1.1.1.282	R02413
EC:1.1.1.282	R06846
EC:1.1.1.282	R06847
EC:1.1.1.284	R06983
EC:1.1.1.284	R07140
EC:1.1.1.285	R07141
EC:1.1.1.285	R07142
EC:1.1.1.287	R07143
EC:1.1.1.287	R07144
EC:1.1.1.288	R06954
EC:1.1.1.289	R07346
EC:1.1.1.29	R01388
EC:1.1.1.290	R04210
EC:1.1.1.291	R07985
EC:1.1.1.292	R08194
EC:1.1.1.294	R08914
EC:1.1.1.294	R08915
EC:1.1.1.298	R09289
EC:1.1.1.3	R01773
EC:1.1.1.3	R01775
EC:1.1.1.30	R01361
EC:1.1.1.300	R08379
EC:1.1.1.301	R09544
EC:1.1.1.302	R09375
EC:1.1.1.302	R09376
EC:1.1.1.303	R02855
EC:1.1.1.304	R09078
EC:1.1.1.305	R07658
EC:1.1.1.306	R09129
EC:1.1.1.307	R01431
EC:1.1.1.307	R09477
EC:1.1.1.308	R09545
EC:1.1.1.31	R02047
EC:1.1.1.310	R05693
EC:1.1.1.312	R04279
EC:1.1.1.343	R10221
EC:1.1.1.346	R08878
EC:1.1.1.347	R10308
EC:1.1.1.348	R11877
EC:1.1.1.349	R10309
EC:1.1.1.35	R01778
EC:1.1.1.350	R02935
EC:1.1.1.353	R09756
EC:1.1.1.353	R10399
EC:1.1.1.353	R10400
EC:1.1.1.354	R10412
EC:1.1.1.356	R10420
EC:1.1.1.356	R10421
EC:1.1.1.357	R10422
EC:1.1.1.357	R10423
EC:1.1.1.359	R10428
EC:1.1.1.359	R10429
EC:1.1.1.36	R01779
EC:1.1.1.361	R10519
EC:1.1.1.363	R00835
EC:1.1.1.363	R10520
EC:1.1.1.365	R07676
EC:1.1.1.367	R10665
EC:1.1.1.368	R05581
EC:1.1.1.369	R09951
EC:1.1.1.37	R00342
EC:1.1.1.370	R09953
EC:1.1.1.371	R09954
EC:1.1.1.372	R01041
EC:1.1.1.372	R10563
EC:1.1.1.373	R10719
EC:1.1.1.374	R10785
EC:1.1.1.377	R10788
EC:1.1.1.378	R10788
EC:1.1.1.378	R10995
EC:1.1.1.38	R00214
EC:1.1.1.38	R00217
EC:1.1.1.380	R10848
EC:1.1.1.381	R03758
EC:1.1.1.381	R10851
EC:1.1.1.381	R10852
EC:1.1.1.384	R05526
EC:1.1.1.385	R10917
EC:1.1.1.388	R10520
EC:1.1.1.39	R00214
EC:1.1.1.396	R09055
EC:1.1.1.397	R11336
EC:1.1.1.399	R11337
EC:1.1.1.4	R02946
EC:1.1.1.40	R00216
EC:1.1.1.40	R00217
EC:1.1.1.400	R11338
EC:1.1.1.401	R11339
EC:1.1.1.402	R11341
EC:1.1.1.403	R11342
EC:1.1.1.404	R11585
EC:1.1.1.405	R01525
EC:1.1.1.407	R11638
EC:1.1.1.408	R11724
EC:1.1.1.409	R11726
EC:1.1.1.41	R00709
EC:1.1.1.412	R11774
EC:1.1.1.413	R11776
EC:1.1.1.42	R00267
EC:1.1.1.42	R00268
EC:1.1.1.42	R01899
EC:1.1.1.44	R01528
EC:1.1.1.45	R02640
EC:1.1.1.47	R01520
EC:1.1.1.47	R01521
EC:1.1.1.48	R01094
EC:1.1.1.49	R00835
EC:1.1.1.50	R10422
EC:1.1.1.50	R10423
EC:1.1.1.51	R01836
EC:1.1.1.51	R01838
EC:1.1.1.53	R04330
EC:1.1.1.56	R01895
EC:1.1.1.57	R02454
EC:1.1.1.58	R02555
EC:1.1.1.6	R01034
EC:1.1.1.60	R01745
EC:1.1.1.60	R01747
EC:1.1.1.61	R01644
EC:1.1.1.62	R02352
EC:1.1.1.62	R02353
EC:1.1.1.64	R01838
EC:1.1.1.65	R01708
EC:1.1.1.67	R00868
EC:1.1.1.69	R01738
EC:1.1.1.69	R01740
EC:1.1.1.76	R03707
EC:1.1.1.77	R02258
EC:1.1.1.77	R03080
EC:1.1.1.79	R00465
EC:1.1.1.8	R00842
EC:1.1.1.81	R01388
EC:1.1.1.81	R01392
EC:1.1.1.82	R00343
EC:1.1.1.83	R00215
EC:1.1.1.85	R01652
EC:1.1.1.85	R04426
EC:1.1.1.85	R10052
EC:1.1.1.86	R04439
EC:1.1.1.87	R01934
EC:1.1.1.88	R02081
EC:1.1.1.9	R01896
EC:1.1.1.90	R01487
EC:1.1.1.91	R01488
EC:1.1.1.93	R02545
EC:1.1.1.93	R06180
EC:1.1.1.94	R00842
EC:1.1.1.94	R00844
EC:1.1.1.95	R01513
EC:1.1.2.3	R00196
EC:1.1.2.4	R00197
EC:1.1.2.6	R03136
EC:1.1.2.7	R10713
EC:1.1.3.13	R00637
EC:1.1.3.15	R01341
EC:1.1.3.17	R01022
EC:1.1.3.17	R08211
EC:1.1.3.17	R08212
EC:1.1.3.20	R00041
EC:1.1.3.21	R00846
EC:1.1.3.37	R02715
EC:1.1.3.41	R11618
EC:1.1.3.46	R06633
EC:1.1.3.47	R10853
EC:1.1.3.47	R10854
EC:1.1.3.47	R10855
EC:1.1.3.47	R10856
EC:1.1.3.47	R10857
EC:1.1.3.47	R10858
EC:1.1.3.49	R11380
EC:1.1.3.6	R01459
EC:1.1.3.8	R00647
EC:1.1.3.8	R03184
EC:1.1.3.8	R10053
EC:1.1.3.9	R01099
EC:1.1.5.11	R11344
EC:1.1.5.12	R11591
EC:1.1.5.2	R06620
EC:1.1.5.3	R00849
EC:1.1.5.4	R00361
EC:1.1.5.8	R09322
EC:1.1.5.9	R00305
EC:1.1.9.1	R09480
EC:1.1.98.2	R09550
EC:1.1.98.3	R10112
EC:1.1.98.4	R10572
EC:1.1.98.5	R10574
EC:1.1.98.6	R11592
EC:1.1.99.1	R01025
EC:1.1.99.18	R01443
EC:1.1.99.18	R06246
EC:1.1.99.2	R00298
EC:1.1.99.21	R01697
EC:1.1.99.24	R03225
EC:1.1.99.28	R00874
EC:1.1.99.29	R07347
EC:1.1.99.29	R07348
EC:1.1.99.3	R01742
EC:1.1.99.31	R03793
EC:1.1.99.37	R09553
EC:1.1.99.38	R08893
EC:1.1.99.39	R10575
EC:1.1.99.40	R11593
EC:1.1.99.6	R00297
EC:1.10.2.2	R02161
EC:1.10.3.1	R00058
EC:1.10.3.10	R11335
EC:1.10.3.11	R09504
EC:1.10.3.12	R09492
EC:1.10.3.14	R11325
EC:1.10.3.14	R11885
EC:1.10.3.14	R11886
EC:1.10.3.2	R00083
EC:1.10.3.3	R00068
EC:1.10.3.9	R09503
EC:1.10.5.1	R07361
EC:1.10.9.1	R03817
EC:1.11.1.1	R00090
EC:1.11.1.10	R00052
EC:1.11.1.11	R00644
EC:1.11.1.11	R03186
EC:1.11.1.11	R09540
EC:1.11.1.12	R03167
EC:1.11.1.13	R00011
EC:1.11.1.15	R07180
EC:1.11.1.19	R10915
EC:1.11.1.20	R09506
EC:1.11.1.21	R00009
EC:1.11.1.21	R03532
EC:1.11.1.5	R00017
EC:1.11.1.6	R00009
EC:1.11.1.7	R03532
EC:1.11.1.8	R02810
EC:1.11.1.8	R08522
EC:1.11.1.8	R08523
EC:1.11.1.9	R00274
EC:1.11.2.1	R09507
EC:1.11.2.2	R09564
EC:1.11.2.4	R09740
EC:1.11.2.4	R09741
EC:1.12.1.2	R00700
EC:1.12.1.3	R07181
EC:1.12.1.4	R09508
EC:1.12.1.5	R00700
EC:1.12.1.5	R07181
EC:1.12.2.1	R04015
EC:1.12.5.1	R02965
EC:1.12.7.2	R00019
EC:1.12.98.1	R03025
EC:1.12.98.2	R04455
EC:1.12.98.3	R09095
EC:1.12.98.4	R10390
EC:1.12.99.6	R07182
EC:1.13.11.1	R00817
EC:1.13.11.11	R00678
EC:1.13.11.12	R03626
EC:1.13.11.12	R07869
EC:1.13.11.14	R01507
EC:1.13.11.15	R03303
EC:1.13.11.16	R04376
EC:1.13.11.16	R06788
EC:1.13.11.18	R08678
EC:1.13.11.18	R11946
EC:1.13.11.18	R11947
EC:1.13.11.19	R02467
EC:1.13.11.2	R00816
EC:1.13.11.20	R00893
EC:1.13.11.24	R02156
EC:1.13.11.25	R04597
EC:1.13.11.27	R02521
EC:1.13.11.3	R01631
EC:1.13.11.31	R01596
EC:1.13.11.33	R01593
EC:1.13.11.34	R01595
EC:1.13.11.34	R03058
EC:1.13.11.34	R08527
EC:1.13.11.37	R04061
EC:1.13.11.38	R07657
EC:1.13.11.39	R03462
EC:1.13.11.4	R02656
EC:1.13.11.41	R01305
EC:1.13.11.46	R06632
EC:1.13.11.47	R05719
EC:1.13.11.48	R05720
EC:1.13.11.5	R02519
EC:1.13.11.51	R06952
EC:1.13.11.51	R06953
EC:1.13.11.51	R09682
EC:1.13.11.52	R00678
EC:1.13.11.52	R07362
EC:1.13.11.53	R07363
EC:1.13.11.54	R07364
EC:1.13.11.55	R07365
EC:1.13.11.56	R04117
EC:1.13.11.57	R09565
EC:1.13.11.58	R07057
EC:1.13.11.59	R09782
EC:1.13.11.6	R02665
EC:1.13.11.60	R07061
EC:1.13.11.61	R09810
EC:1.13.11.62	R09811
EC:1.13.11.63	R00032
EC:1.13.11.65	R10192
EC:1.13.11.66	R05246
EC:1.13.11.68	R10557
EC:1.13.11.69	R10558
EC:1.13.11.70	R10560
EC:1.13.11.71	R10559
EC:1.13.11.74	R05405
EC:1.13.11.75	R09601
EC:1.13.11.76	R10521
EC:1.13.11.78	R10722
EC:1.13.11.79	R09083
EC:1.13.11.8	R01632
EC:1.13.11.80	R06624
EC:1.13.11.81	R11037
EC:1.13.11.82	R11052
EC:1.13.11.9	R09125
EC:1.13.12.16	R00025
EC:1.13.12.3	R00679
EC:1.13.12.4	R00319
EC:1.13.12.9	R00690
EC:1.13.99.1	R01184
EC:1.14.11.1	R02397
EC:1.14.11.12	R07184
EC:1.14.11.13	R03008
EC:1.14.11.15	R03009
EC:1.14.11.16	R04073
EC:1.14.11.17	R05320
EC:1.14.11.18	R05722
EC:1.14.11.19	R05723
EC:1.14.11.19	R07366
EC:1.14.11.2	R03219
EC:1.14.11.23	R07368
EC:1.14.11.26	R05229
EC:1.14.11.27	R09510
EC:1.14.11.27	R09511
EC:1.14.11.27	R10056
EC:1.14.11.38	R10445
EC:1.14.11.4	R03376
EC:1.14.11.42	R10522
EC:1.14.11.45	R10723
EC:1.14.11.46	R10724
EC:1.14.11.52	R11340
EC:1.14.11.55	R08050
EC:1.14.11.57	R01252
EC:1.14.11.7	R03218
EC:1.14.11.8	R03451
EC:1.14.11.9	R07329
EC:1.14.12.1	R00823
EC:1.14.12.1	R00825
EC:1.14.12.10	R07188
EC:1.14.12.11	R03559
EC:1.14.12.12	R02968
EC:1.14.12.14	R05156
EC:1.14.12.17	R05724
EC:1.14.12.17	R05725
EC:1.14.12.18	R05263
EC:1.14.12.19	R06782
EC:1.14.12.22	R05414
EC:1.14.12.22	R09512
EC:1.14.12.23	R07706
EC:1.14.12.24	R09233
EC:1.14.12.25	R05247
EC:1.14.12.3	R03543
EC:1.14.12.7	R03630
EC:1.14.13.1	R00818
EC:1.14.13.107	R06398
EC:1.14.13.107	R09385
EC:1.14.13.107	R09389
EC:1.14.13.107	R09393
EC:1.14.13.11	R02253
EC:1.14.13.111	R09513
EC:1.14.13.112	R07791
EC:1.14.13.112	R07792
EC:1.14.13.113	R09514
EC:1.14.13.114	R08764
EC:1.14.13.12	R01295
EC:1.14.13.122	R08203
EC:1.14.13.122	R08204
EC:1.14.13.122	R10080
EC:1.14.13.127	R06786
EC:1.14.13.127	R06787
EC:1.14.13.136	R07777
EC:1.14.13.136	R07778
EC:1.14.13.139	R07422
EC:1.14.13.141	R09859
EC:1.14.13.141	R11355
EC:1.14.13.141	R11356
EC:1.14.13.141	R11357
EC:1.14.13.142	R09860
EC:1.14.13.148	R05623
EC:1.14.13.149	R09838
EC:1.14.13.151	R04366
EC:1.14.13.151	R09924
EC:1.14.13.151	R09925
EC:1.14.13.160	R10044
EC:1.14.13.162	R04102
EC:1.14.13.163	R09472
EC:1.14.13.167	R05258
EC:1.14.13.168	R10181
EC:1.14.13.170	R10154
EC:1.14.13.171	R10155
EC:1.14.13.172	R07709
EC:1.14.13.173	R10313
EC:1.14.13.173	R10314
EC:1.14.13.173	R10315
EC:1.14.13.173	R10316
EC:1.14.13.174	R10317
EC:1.14.13.174	R10318
EC:1.14.13.175	R10319
EC:1.14.13.175	R10320
EC:1.14.13.178	R07955
EC:1.14.13.178	R07956
EC:1.14.13.178	R07957
EC:1.14.13.178	R07958
EC:1.14.13.178	R07973
EC:1.14.13.178	R07974
EC:1.14.13.179	R07961
EC:1.14.13.179	R07962
EC:1.14.13.179	R07967
EC:1.14.13.179	R07968
EC:1.14.13.194	R10728
EC:1.14.13.195	R10789
EC:1.14.13.196	R10789
EC:1.14.13.196	R10790
EC:1.14.13.2	R01298
EC:1.14.13.20	R03997
EC:1.14.13.200	R06704
EC:1.14.13.201	R10921
EC:1.14.13.201	R10922
EC:1.14.13.201	R10923
EC:1.14.13.201	R10924
EC:1.14.13.202	R08148
EC:1.14.13.203	R10925
EC:1.14.13.206	R11054
EC:1.14.13.208	R09555
EC:1.14.13.209	R11056
EC:1.14.13.21	R03615
EC:1.14.13.211	R11151
EC:1.14.13.211	R11152
EC:1.14.13.218	R11346
EC:1.14.13.219	R05249
EC:1.14.13.22	R02231
EC:1.14.13.221	R11358
EC:1.14.13.221	R11359
EC:1.14.13.221	R11360
EC:1.14.13.221	R11361
EC:1.14.13.224	R11132
EC:1.14.13.224	R11135
EC:1.14.13.224	R11373
EC:1.14.13.224	R11374
EC:1.14.13.225	R11425
EC:1.14.13.226	R10704
EC:1.14.13.227	R10702
EC:1.14.13.229	R11447
EC:1.14.13.230	R11448
EC:1.14.13.231	R11449
EC:1.14.13.235	R11730
EC:1.14.13.236	R05666
EC:1.14.13.237	R11804
EC:1.14.13.238	R11805
EC:1.14.13.239	R11875
EC:1.14.13.239	R11911
EC:1.14.13.24	R02589
EC:1.14.13.25	R01142
EC:1.14.13.25	R01143
EC:1.14.13.29	R03023
EC:1.14.13.30	R03866
EC:1.14.13.32	R03712
EC:1.14.13.36	R04342
EC:1.14.13.39	R00111
EC:1.14.13.39	R00557
EC:1.14.13.39	R00558
EC:1.14.13.40	R03998
EC:1.14.13.40	R03999
EC:1.14.13.50	R03982
EC:1.14.13.50	R07191
EC:1.14.13.53	R06560
EC:1.14.13.59	R00448
EC:1.14.13.63	R02515
EC:1.14.13.63	R02517
EC:1.14.13.7	R00815
EC:1.14.13.70	R05731
EC:1.14.13.77	R06308
EC:1.14.13.78	R06291
EC:1.14.13.78	R06292
EC:1.14.13.78	R06293
EC:1.14.13.78	R10066
EC:1.14.13.79	R06294
EC:1.14.13.79	R06295
EC:1.14.13.79	R06297
EC:1.14.13.79	R10067
EC:1.14.13.8	R03344
EC:1.14.13.81	R06265
EC:1.14.13.81	R06266
EC:1.14.13.81	R06267
EC:1.14.13.81	R10068
EC:1.14.13.82	R05274
EC:1.14.13.83	R05217
EC:1.14.13.84	R06892
EC:1.14.13.88	R07369
EC:1.14.13.88	R07370
EC:1.14.13.88	R10069
EC:1.14.13.89	R07371
EC:1.14.13.9	R01960
EC:1.14.13.93	R07202
EC:1.14.13.96	R07204
EC:1.14.13.97	R07205
EC:1.14.13.97	R07206
EC:1.14.14.1	R04122
EC:1.14.14.10	R09798
EC:1.14.14.12	R09819
EC:1.14.14.14	R01840
EC:1.14.14.14	R02351
EC:1.14.14.14	R02501
EC:1.14.14.14	R03087
EC:1.14.14.14	R04759
EC:1.14.14.14	R04761
EC:1.14.14.14	R10511
EC:1.14.14.14	R10515
EC:1.14.14.16	R02130
EC:1.14.14.17	R02874
EC:1.14.14.18	R00311
EC:1.14.14.19	R02131
EC:1.14.14.23	R01463
EC:1.14.14.24	R03611
EC:1.14.14.25	R07207
EC:1.14.14.26	R07208
EC:1.14.14.27	R11348
EC:1.14.14.29	R07209
EC:1.14.14.29	R07372
EC:1.14.14.3	R10551
EC:1.14.14.30	R11403
EC:1.14.14.30	R11404
EC:1.14.14.32	R08517
EC:1.14.14.32	R08518
EC:1.14.14.35	R11457
EC:1.14.14.38	R08663
EC:1.14.14.38	R10031
EC:1.14.14.38	R10032
EC:1.14.14.38	R10033
EC:1.14.14.40	R09578
EC:1.14.14.40	R09579
EC:1.14.14.40	R09580
EC:1.14.14.40	R09581
EC:1.14.14.43	R11650
EC:1.14.14.43	R11651
EC:1.14.14.43	R11652
EC:1.14.14.46	R10123
EC:1.14.14.47	R11711
EC:1.14.14.47	R11712
EC:1.14.14.47	R11713
EC:1.14.14.48	R11806
EC:1.14.14.49	R11807
EC:1.14.14.49	R11808
EC:1.14.14.49	R11809
EC:1.14.14.5	R07210
EC:1.14.14.54	R05487
EC:1.14.14.55	R05727
EC:1.14.14.56	R10076
EC:1.14.15.11	R10158
EC:1.14.15.15	R03507
EC:1.14.15.15	R04807
EC:1.14.15.15	R08761
EC:1.14.15.15	R11142
EC:1.14.15.16	R09515
EC:1.14.15.16	R09516
EC:1.14.15.17	R08921
EC:1.14.15.17	R11227
EC:1.14.15.17	R11228
EC:1.14.15.18	R03610
EC:1.14.15.18	R11324
EC:1.14.15.20	R11579
EC:1.14.15.21	R06946
EC:1.14.15.21	R06947
EC:1.14.15.21	R10070
EC:1.14.15.22	R11458
EC:1.14.15.22	R11459
EC:1.14.15.23	R11812
EC:1.14.15.24	R07558
EC:1.14.15.24	R07559
EC:1.14.15.24	R09747
EC:1.14.15.3	R02879
EC:1.14.15.4	R02726
EC:1.14.15.6	R02723
EC:1.14.15.6	R02724
EC:1.14.15.6	R03933
EC:1.14.15.6	R04855
EC:1.14.15.7	R05739
EC:1.14.16.1	R07211
EC:1.14.16.2	R07212
EC:1.14.16.4	R07213
EC:1.14.16.5	R04044
EC:1.14.17.1	R02535
EC:1.14.17.3	R03912
EC:1.14.17.4	R07214
EC:1.14.18.1	R00031
EC:1.14.18.1	R00045
EC:1.14.18.2	R01115
EC:1.14.18.3	R09518
EC:1.14.18.4	R11002
EC:1.14.18.5	R06526
EC:1.14.18.6	R11001
EC:1.14.18.7	R11003
EC:1.14.18.8	R04826
EC:1.14.18.9	R04501
EC:1.14.18.9	R05733
EC:1.14.18.9	R05734
EC:1.14.18.9	R10057
EC:1.14.19.1	R02222
EC:1.14.19.11	R11108
EC:1.14.19.17	R06519
EC:1.14.19.18	R11005
EC:1.14.19.2	R03370
EC:1.14.19.21	R11007
EC:1.14.19.21	R11008
EC:1.14.19.26	R11109
EC:1.14.19.29	R11009
EC:1.14.19.29	R11010
EC:1.14.19.3	R03814
EC:1.14.19.3	R07933
EC:1.14.19.41	R07506
EC:1.14.19.44	R11059
EC:1.14.19.44	R11060
EC:1.14.19.48	R11477
EC:1.14.19.49	R11478
EC:1.14.19.6	R11043
EC:1.14.19.6	R11044
EC:1.14.19.9	R09570
EC:1.14.99.1	R01599
EC:1.14.99.22	R02374
EC:1.14.99.29	R04437
EC:1.14.99.38	R07218
EC:1.14.99.39	R09519
EC:1.14.99.43	R09604
EC:1.14.99.43	R09605
EC:1.14.99.44	R09671
EC:1.14.99.45	R07850
EC:1.14.99.46	R09936
EC:1.14.99.46	R09937
EC:1.14.99.48	R10468
EC:1.14.99.48	R10510
EC:1.14.99.49	R10796
EC:1.14.99.50	R11013
EC:1.14.99.51	R11014
EC:1.14.99.53	R11660
EC:1.14.99.54	R11745
EC:1.14.99.56	R11747
EC:1.14.99.57	R11741
EC:1.14.99.57	R11742
EC:1.14.99.58	R11816
EC:1.14.99.58	R11817
EC:1.14.99.59	R11912
EC:1.15.1.1	R00275
EC:1.15.1.2	R05743
EC:1.16.1.1	R02807
EC:1.16.1.3	R00097
EC:1.16.1.5	R00107
EC:1.16.1.7	R00092
EC:1.16.1.8	R05182
EC:1.16.1.9	R09541
EC:1.16.3.1	R00078
EC:1.16.3.3	R11880
EC:1.16.3.3	R11881
EC:1.16.3.3	R11882
EC:1.16.5.1	R09739
EC:1.17.1.1	R03391
EC:1.17.1.1	R03392
EC:1.17.1.10	R00134
EC:1.17.1.11	R11818
EC:1.17.1.3	R06532
EC:1.17.1.4	R02103
EC:1.17.1.5	R01720
EC:1.17.1.8	R04198
EC:1.17.1.8	R04199
EC:1.17.1.9	R00519
EC:1.17.2.1	R09473
EC:1.17.2.2	R09938
EC:1.17.3.2	R02107
EC:1.17.4.1	R04294
EC:1.17.4.2	R04315
EC:1.17.4.4	R03511
EC:1.17.5.1	R07222
EC:1.17.5.2	R07980
EC:1.17.5.3	R09494
EC:1.17.7.1	R08689
EC:1.17.7.2	R09071
EC:1.17.7.3	R10859
EC:1.17.7.4	R05884
EC:1.17.7.4	R08210
EC:1.17.8.1	R11401
EC:1.17.98.2	R10437
EC:1.17.98.2	R11484
EC:1.17.98.2	R11709
EC:1.17.98.2	R11710
EC:1.17.99.1	R07223
EC:1.17.99.3	R07374
EC:1.17.99.7	R09481
EC:1.18.1.1	R02000
EC:1.18.1.2	R01195
EC:1.18.1.3	R05875
EC:1.18.1.6	R10159
EC:1.18.6.1	R05185
EC:1.19.1.1	R11485
EC:1.2.1.10	R00228
EC:1.2.1.11	R02291
EC:1.2.1.12	R01061
EC:1.2.1.13	R01063
EC:1.2.1.16	R00713
EC:1.2.1.16	R00714
EC:1.2.1.18	R00705
EC:1.2.1.18	R00706
EC:1.2.1.19	R02549
EC:1.2.1.20	R02401
EC:1.2.1.21	R01333
EC:1.2.1.22	R01446
EC:1.2.1.24	R00713
EC:1.2.1.26	R00264
EC:1.2.1.27	R00922
EC:1.2.1.28	R01419
EC:1.2.1.3	R00538
EC:1.2.1.31	R02317
EC:1.2.1.31	R03102
EC:1.2.1.31	R03103
EC:1.2.1.31	R11231
EC:1.2.1.31	R11232
EC:1.2.1.32	R03889
EC:1.2.1.36	R02123
EC:1.2.1.38	R03443
EC:1.2.1.39	R02536
EC:1.2.1.4	R00634
EC:1.2.1.41	R03313
EC:1.2.1.44	R02506
EC:1.2.1.46	R00604
EC:1.2.1.47	R03283
EC:1.2.1.5	R00538
EC:1.2.1.5	R00634
EC:1.2.1.50	R10549
EC:1.2.1.51	R00210
EC:1.2.1.54	R03177
EC:1.2.1.58	R02450
EC:1.2.1.59	R01061
EC:1.2.1.59	R01063
EC:1.2.1.60	R04418
EC:1.2.1.63	R05099
EC:1.2.1.65	R02941
EC:1.2.1.67	R05699
EC:1.2.1.68	R05700
EC:1.2.1.68	R05701
EC:1.2.1.70	R04109
EC:1.2.1.71	R05049
EC:1.2.1.72	R01825
EC:1.2.1.75	R00740
EC:1.2.1.76	R09280
EC:1.2.1.77	R09554
EC:1.2.1.78	R05643
EC:1.2.1.79	R00714
EC:1.2.1.8	R02565
EC:1.2.1.80	R09484
EC:1.2.1.80	R09485
EC:1.2.1.81	R09557
EC:1.2.1.82	R09783
EC:1.2.1.84	R10104
EC:1.2.1.85	R02762
EC:1.2.1.87	R09097
EC:1.2.1.88	R00245
EC:1.2.1.9	R01058
EC:1.2.1.90	R01058
EC:1.2.1.90	R10860
EC:1.2.1.91	R09820
EC:1.2.1.92	R10861
EC:1.2.1.92	R10862
EC:1.2.1.95	R11679
EC:1.2.1.96	R01294
EC:1.2.1.98	R11350
EC:1.2.1.99	R07417
EC:1.2.1.99	R07418
EC:1.2.3.1	R00635
EC:1.2.3.14	R06957
EC:1.2.3.15	R11351
EC:1.2.3.15	R11352
EC:1.2.3.3	R00207
EC:1.2.3.7	R02681
EC:1.2.4.1	R01699
EC:1.2.4.2	R01700
EC:1.2.4.4	R01701
EC:1.2.5.3	R11168
EC:1.2.7.1	R01196
EC:1.2.7.10	R09486
EC:1.2.7.11	R10516
EC:1.2.7.12	R11743
EC:1.2.7.3	R01197
EC:1.2.7.4	R07157
EC:1.2.7.5	R07158
EC:1.2.7.6	R07159
EC:1.2.7.7	R07160
EC:1.2.7.8	R07161
EC:1.2.98.1	R00614
EC:1.2.99.10	R11913
EC:1.2.99.10	R11914
EC:1.2.99.7	R00544
EC:1.2.99.8	R10324
EC:1.20.1.1	R05746
EC:1.20.2.1	R09787
EC:1.20.4.1	R05747
EC:1.20.9.1	R05751
EC:1.21.1.1	R09521
EC:1.21.1.1	R09522
EC:1.21.1.1	R10059
EC:1.21.4.2	R07226
EC:1.21.4.3	R07227
EC:1.21.4.4	R07228
EC:1.21.98.1	R08588
EC:1.21.98.2	R09566
EC:1.21.98.3	R06268
EC:1.21.98.3	R06269
EC:1.21.98.3	R06270
EC:1.21.98.3	R11494
EC:1.21.99.3	R07230
EC:1.21.99.4	R03734
EC:1.21.99.5	R05753
EC:1.23.1.1	R10225
EC:1.23.1.2	R10226
EC:1.23.1.3	R10227
EC:1.23.1.4	R10228
EC:1.23.5.1	R07178
EC:1.23.5.1	R07179
EC:1.23.5.1	R10055
EC:1.3.1.1	R00977
EC:1.3.1.1	R01414
EC:1.3.1.10	R01404
EC:1.3.1.101	R10325
EC:1.3.1.101	R10326
EC:1.3.1.104	R01404
EC:1.3.1.105	R10593
EC:1.3.1.106	R05812
EC:1.3.1.108	R11674
EC:1.3.1.111	R11226
EC:1.3.1.12	R01728
EC:1.3.1.13	R01730
EC:1.3.1.14	R01869
EC:1.3.1.19	R00812
EC:1.3.1.2	R00978
EC:1.3.1.20	R00814
EC:1.3.1.21	R01456
EC:1.3.1.22	R02610
EC:1.3.1.24	R02391
EC:1.3.1.24	R02393
EC:1.3.1.25	R00813
EC:1.3.1.28	R01505
EC:1.3.1.29	R04115
EC:1.3.1.3	R02609
EC:1.3.1.3	R02893
EC:1.3.1.31	R01689
EC:1.3.1.32	R02988
EC:1.3.1.32	R02989
EC:1.3.1.33	R03845
EC:1.3.1.34	R04319
EC:1.3.1.38	R07162
EC:1.3.1.42	R03401
EC:1.3.1.43	R00732
EC:1.3.1.44	R00384
EC:1.3.1.45	R06562
EC:1.3.1.48	R04556
EC:1.3.1.48	R04557
EC:1.3.1.54	R05150
EC:1.3.1.56	R05239
EC:1.3.1.6	R00402
EC:1.3.1.60	R05310
EC:1.3.1.64	R05275
EC:1.3.1.70	R05639
EC:1.3.1.71	R05641
EC:1.3.1.72	R05703
EC:1.3.1.74	R07349
EC:1.3.1.74	R07350
EC:1.3.1.75	R06896
EC:1.3.1.76	R03947
EC:1.3.1.77	R07351
EC:1.3.1.77	R07352
EC:1.3.1.78	R00733
EC:1.3.1.83	R02063
EC:1.3.1.84	R00919
EC:1.3.1.85	R09291
EC:1.3.1.86	R09738
EC:1.3.1.87	R06784
EC:1.3.1.87	R06785
EC:1.3.1.9	R01403
EC:1.3.1.93	R10828
EC:1.3.1.95	R10161
EC:1.3.1.98	R03192
EC:1.3.2.3	R00640
EC:1.3.2.3	R07679
EC:1.3.3.11	R07353
EC:1.3.3.13	R10327
EC:1.3.3.13	R10328
EC:1.3.3.13	R10329
EC:1.3.3.15	R04178
EC:1.3.3.3	R03220
EC:1.3.3.4	R03222
EC:1.3.3.5	R02394
EC:1.3.3.6	R00388
EC:1.3.4.1	R10660
EC:1.3.5.1	R02164
EC:1.3.5.2	R01868
EC:1.3.5.3	R09489
EC:1.3.5.4	R02164
EC:1.3.5.5	R09652
EC:1.3.5.5	R09653
EC:1.3.5.5	R09654
EC:1.3.5.6	R07511
EC:1.3.5.6	R09656
EC:1.3.5.6	R09658
EC:1.3.7.1	R03164
EC:1.3.7.12	R09032
EC:1.3.7.13	R11519
EC:1.3.7.14	R11531
EC:1.3.7.15	R09053
EC:1.3.7.15	R09060
EC:1.3.7.2	R05818
EC:1.3.7.3	R05819
EC:1.3.7.4	R03678
EC:1.3.7.5	R05817
EC:1.3.7.7	R06282
EC:1.3.7.8	R02451
EC:1.3.7.9	R05316
EC:1.3.8.1	R01178
EC:1.3.8.12	R09293
EC:1.3.8.13	R11600
EC:1.3.8.14	R06747
EC:1.3.8.4	R04096
EC:1.3.8.6	R02488
EC:1.3.8.6	R03028
EC:1.3.8.6	R10074
EC:1.3.8.7	R00392
EC:1.3.8.8	R00392
EC:1.3.98.1	R01867
EC:1.3.98.3	R06895
EC:1.3.99.12	R03173
EC:1.3.99.16	R05151
EC:1.3.99.23	R07163
EC:1.3.99.24	R09559
EC:1.3.99.26	R04798
EC:1.3.99.26	R04800
EC:1.3.99.26	R09659
EC:1.3.99.27	R07520
EC:1.3.99.28	R04787
EC:1.3.99.28	R04798
EC:1.3.99.28	R09691
EC:1.3.99.28	R09692
EC:1.3.99.29	R04787
EC:1.3.99.29	R09692
EC:1.3.99.29	R09693
EC:1.3.99.30	R04787
EC:1.3.99.30	R04798
EC:1.3.99.30	R04800
EC:1.3.99.30	R07518
EC:1.3.99.30	R09692
EC:1.3.99.30	R09703
EC:1.3.99.31	R04787
EC:1.3.99.31	R04798
EC:1.3.99.31	R04800
EC:1.3.99.31	R09692
EC:1.3.99.31	R09716
EC:1.3.99.32	R05579
EC:1.3.99.33	R10330
EC:1.3.99.38	R11654
EC:1.3.99.4	R03748
EC:1.3.99.5	R02643
EC:1.3.99.8	R02987
EC:1.4.1.1	R00396
EC:1.4.1.11	R03349
EC:1.4.1.12	R04200
EC:1.4.1.12	R04201
EC:1.4.1.13	R00114
EC:1.4.1.13	R00248
EC:1.4.1.13	R00256
EC:1.4.1.14	R00093
EC:1.4.1.16	R02755
EC:1.4.1.18	R00446
EC:1.4.1.18	R02317
EC:1.4.1.18	R10054
EC:1.4.1.2	R00243
EC:1.4.1.20	R00688
EC:1.4.1.21	R07164
EC:1.4.1.21	R07165
EC:1.4.1.24	R08569
EC:1.4.1.25	R11031
EC:1.4.1.25	R11032
EC:1.4.1.26	R04200
EC:1.4.1.3	R00243
EC:1.4.1.3	R00248
EC:1.4.1.4	R00248
EC:1.4.1.9	R01088
EC:1.4.3.1	R00359
EC:1.4.3.10	R01151
EC:1.4.3.13	R04239
EC:1.4.3.16	R00481
EC:1.4.3.19	R00366
EC:1.4.3.19	R07463
EC:1.4.3.19	R10245
EC:1.4.3.2	R01259
EC:1.4.3.21	R01853
EC:1.4.3.22	R02150
EC:1.4.3.23	R09560
EC:1.4.3.24	R10103
EC:1.4.3.3	R01340
EC:1.4.3.4	R11354
EC:1.4.3.5	R00277
EC:1.4.3.5	R00278
EC:1.4.4.2	R03425
EC:1.4.5.1	R09493
EC:1.4.7.1	R00021
EC:1.4.7.1	R00256
EC:1.4.7.1	R10086
EC:1.4.9.1	R00606
EC:1.4.99.5	R05704
EC:1.4.99.6	R11016
EC:1.4.99.6	R11017
EC:1.4.99.6	R11018
EC:1.5.1.1	R01246
EC:1.5.1.1	R01249
EC:1.5.1.1	R02201
EC:1.5.1.1	R02203
EC:1.5.1.10	R02315
EC:1.5.1.15	R01218
EC:1.5.1.2	R01248
EC:1.5.1.2	R01251
EC:1.5.1.20	R01224
EC:1.5.1.20	R07168
EC:1.5.1.21	R01249
EC:1.5.1.21	R02203
EC:1.5.1.24	R00666
EC:1.5.1.25	R04339
EC:1.5.1.25	R04340
EC:1.5.1.28	R03732
EC:1.5.1.3	R00939
EC:1.5.1.30	R05707
EC:1.5.1.33	R01812
EC:1.5.1.34	R07354
EC:1.5.1.34	R07355
EC:1.5.1.36	R09662
EC:1.5.1.38	R05706
EC:1.5.1.39	R05705
EC:1.5.1.39	R05706
EC:1.5.1.40	R09749
EC:1.5.1.41	R05707
EC:1.5.1.41	R09750
EC:1.5.1.42	R05705
EC:1.5.1.47	R03388
EC:1.5.1.47	R10332
EC:1.5.1.48	R10730
EC:1.5.1.5	R01220
EC:1.5.1.50	R11019
EC:1.5.1.51	R11655
EC:1.5.1.6	R00941
EC:1.5.1.7	R00715
EC:1.5.1.8	R00716
EC:1.5.1.9	R02313
EC:1.5.3.1	R00610
EC:1.5.3.13	R03899
EC:1.5.3.13	R09074
EC:1.5.3.14	R01914
EC:1.5.3.16	R09076
EC:1.5.3.17	R03899
EC:1.5.3.17	R09074
EC:1.5.3.17	R09076
EC:1.5.3.17	R09077
EC:1.5.3.19	R10102
EC:1.5.3.22	R10602
EC:1.5.3.7	R02204
EC:1.5.4.1	R03984
EC:1.5.5.1	R04433
EC:1.5.5.2	R01253
EC:1.5.5.3	R03295
EC:1.5.7.2	R10603
EC:1.5.8.1	R01588
EC:1.5.8.2	R02511
EC:1.5.8.3	R00611
EC:1.5.8.4	R01565
EC:1.5.98.1	R04456
EC:1.5.98.2	R04464
EC:1.5.98.3	R11874
EC:1.5.99.12	R05708
EC:1.5.99.15	R10802
EC:1.5.99.5	R00609
EC:1.5.99.6	R01915
EC:1.6.1.1	R00112
EC:1.6.1.2	R00112
EC:1.6.2.2	R00100
EC:1.6.3.1	R07171
EC:1.6.3.1	R07172
EC:1.6.3.3	R07171
EC:1.6.3.4	R10517
EC:1.6.3.5	R11504
EC:1.6.3.5	R11505
EC:1.6.5.2	R07358
EC:1.6.5.2	R07359
EC:1.6.5.3	R02163
EC:1.6.5.4	R00095
EC:1.6.5.5	R02364
EC:1.6.5.8	R02163
EC:1.6.5.9	R02163
EC:1.6.99.1	R00282
EC:1.6.99.3	R00281
EC:1.7.1.1	R00794
EC:1.7.1.13	R07605
EC:1.7.1.14	R02492
EC:1.7.1.14	R09446
EC:1.7.1.15	R00787
EC:1.7.1.16	R05400
EC:1.7.1.16	R05401
EC:1.7.1.16	R11744
EC:1.7.1.2	R00794
EC:1.7.1.2	R00796
EC:1.7.1.3	R00796
EC:1.7.1.4	R00787
EC:1.7.1.4	R00789
EC:1.7.1.7	R01134
EC:1.7.2.1	R00783
EC:1.7.2.2	R05712
EC:1.7.2.4	R02804
EC:1.7.2.5	R00294
EC:1.7.2.6	R10164
EC:1.7.2.6	R10165
EC:1.7.2.7	R09799
EC:1.7.3.3	R02106
EC:1.7.5.1	R09497
EC:1.7.7.1	R00790
EC:1.7.7.2	R00791
EC:1.7.99.1	R00284
EC:1.8.1.14	R07175
EC:1.8.1.15	R05715
EC:1.8.1.15	R05716
EC:1.8.1.15	R06289
EC:1.8.1.15	R06290
EC:1.8.1.18	R10419
EC:1.8.1.18	R10438
EC:1.8.1.19	R10512
EC:1.8.1.2	R00858
EC:1.8.1.4	R08550
EC:1.8.1.7	R00115
EC:1.8.1.8	R03913
EC:1.8.1.8	R03914
EC:1.8.1.9	R02016
EC:1.8.2.1	R00528
EC:1.8.2.2	R00029
EC:1.8.2.3	R09499
EC:1.8.2.4	R09500
EC:1.8.3.1	R00533
EC:1.8.3.2	R00057
EC:1.8.3.5	R07360
EC:1.8.3.6	R09562
EC:1.8.3.7	R11878
EC:1.8.4.10	R07176
EC:1.8.4.11	R04120
EC:1.8.4.11	R07606
EC:1.8.4.12	R07607
EC:1.8.4.14	R07608
EC:1.8.4.2	R03915
EC:1.8.4.8	R02021
EC:1.8.4.9	R05717
EC:1.8.5.1	R01108
EC:1.8.5.2	R07177
EC:1.8.5.3	R09501
EC:1.8.5.4	R10152
EC:1.8.5.5	R11488
EC:1.8.5.6	R11487
EC:1.8.5.7	R11659
EC:1.8.7.1	R00859
EC:1.8.7.2	R09502
EC:1.8.98.1	R04540
EC:1.8.98.3	R10803
EC:1.8.99.2	R00860
EC:1.9.3.1	R00081
EC:1.97.1.9	R07229
EC:2.1.1.1	R01269
EC:2.1.1.10	R11063
EC:2.1.1.100	R04496
EC:2.1.1.103	R02037
EC:2.1.1.104	R01942
EC:2.1.1.106	R08547
EC:2.1.1.107	R03194
EC:2.1.1.107	R07237
EC:2.1.1.107	R07238
EC:2.1.1.109	R03112
EC:2.1.1.11	R04237
EC:2.1.1.110	R03111
EC:2.1.1.110	R10307
EC:2.1.1.112	R04332
EC:2.1.1.113	R03003
EC:2.1.1.114	R08771
EC:2.1.1.12	R00649
EC:2.1.1.127	R05179
EC:2.1.1.13	R00946
EC:2.1.1.130	R03948
EC:2.1.1.131	R05180
EC:2.1.1.132	R05149
EC:2.1.1.133	R05181
EC:2.1.1.137	R05755
EC:2.1.1.137	R05756
EC:2.1.1.14	R04405
EC:2.1.1.141	R05759
EC:2.1.1.143	R05776
EC:2.1.1.144	R05763
EC:2.1.1.145	R05764
EC:2.1.1.148	R06613
EC:2.1.1.151	R05808
EC:2.1.1.152	R05219
EC:2.1.1.154	R07242
EC:2.1.1.156	R00367
EC:2.1.1.156	R07243
EC:2.1.1.156	R10060
EC:2.1.1.157	R07243
EC:2.1.1.157	R07244
EC:2.1.1.157	R10061
EC:2.1.1.159	R07919
EC:2.1.1.163	R09736
EC:2.1.1.165	R09523
EC:2.1.1.17	R02056
EC:2.1.1.171	R07234
EC:2.1.1.172	R07234
EC:2.1.1.173	R07234
EC:2.1.1.174	R07234
EC:2.1.1.181	R07232
EC:2.1.1.184	R10716
EC:2.1.1.187	R07233
EC:2.1.1.195	R07773
EC:2.1.1.196	R07774
EC:2.1.1.197	R09543
EC:2.1.1.2	R01883
EC:2.1.1.20	R00367
EC:2.1.1.201	R09737
EC:2.1.1.202	R00595
EC:2.1.1.203	R00595
EC:2.1.1.204	R00595
EC:2.1.1.21	R01586
EC:2.1.1.210	R07535
EC:2.1.1.22	R02144
EC:2.1.1.222	R08769
EC:2.1.1.228	R00597
EC:2.1.1.234	R06427
EC:2.1.1.239	R06456
EC:2.1.1.240	R09870
EC:2.1.1.240	R09871
EC:2.1.1.240	R09872
EC:2.1.1.241	R08973
EC:2.1.1.243	R09939
EC:2.1.1.245	R10385
EC:2.1.1.246	R10000
EC:2.1.1.247	R10000
EC:2.1.1.248	R10014
EC:2.1.1.249	R10015
EC:2.1.1.250	R10016
EC:2.1.1.251	R09997
EC:2.1.1.251	R10000
EC:2.1.1.251	R10001
EC:2.1.1.255	R09940
EC:2.1.1.258	R02289
EC:2.1.1.269	R10333
EC:2.1.1.271	R05810
EC:2.1.1.272	R11580
EC:2.1.1.273	R10447
EC:2.1.1.274	R10448
EC:2.1.1.276	R10450
EC:2.1.1.278	R10452
EC:2.1.1.28	R04033
EC:2.1.1.281	R10431
EC:2.1.1.282	R10498
EC:2.1.1.285	R06771
EC:2.1.1.286	R10497
EC:2.1.1.287	R10497
EC:2.1.1.289	R07775
EC:2.1.1.290	R10586
EC:2.1.1.291	R10605
EC:2.1.1.291	R10606
EC:2.1.1.293	R10588
EC:2.1.1.294	R10658
EC:2.1.1.295	R07501
EC:2.1.1.295	R10709
EC:2.1.1.295	R10710
EC:2.1.1.296	R10812
EC:2.1.1.302	R10962
EC:2.1.1.303	R10963
EC:2.1.1.304	R10964
EC:2.1.1.306	R10957
EC:2.1.1.314	R11165
EC:2.1.1.315	R06998
EC:2.1.1.317	R11193
EC:2.1.1.319	R11216
EC:2.1.1.319	R11217
EC:2.1.1.319	R11219
EC:2.1.1.320	R11216
EC:2.1.1.320	R11218
EC:2.1.1.320	R11220
EC:2.1.1.321	R11216
EC:2.1.1.322	R11221
EC:2.1.1.325	R08147
EC:2.1.1.325	R08151
EC:2.1.1.328	R11534
EC:2.1.1.33	R00600
EC:2.1.1.331	R11507
EC:2.1.1.332	R11508
EC:2.1.1.332	R11509
EC:2.1.1.333	R09063
EC:2.1.1.334	R11546
EC:2.1.1.337	R08791
EC:2.1.1.337	R11595
EC:2.1.1.34	R02917
EC:2.1.1.341	R09271
EC:2.1.1.341	R10136
EC:2.1.1.342	R11700
EC:2.1.1.35	R00594
EC:2.1.1.37	R00380
EC:2.1.1.4	R03130
EC:2.1.1.41	R04427
EC:2.1.1.43	R03938
EC:2.1.1.44	R01169
EC:2.1.1.44	R04436
EC:2.1.1.44	R10523
EC:2.1.1.44	R10524
EC:2.1.1.45	R02101
EC:2.1.1.49	R02808
EC:2.1.1.5	R02821
EC:2.1.1.53	R01153
EC:2.1.1.56	R03805
EC:2.1.1.57	R03922
EC:2.1.1.6	R07330
EC:2.1.1.60	R04062
EC:2.1.1.61	R00601
EC:2.1.1.62	R03788
EC:2.1.1.63	R04314
EC:2.1.1.64	R08781
EC:2.1.1.67	R03701
EC:2.1.1.68	R03366
EC:2.1.1.71	R03424
EC:2.1.1.72	R02961
EC:2.1.1.74	R03704
EC:2.1.1.77	R04190
EC:2.1.1.79	R03411
EC:2.1.1.8	R02155
EC:2.1.1.80	R02623
EC:2.1.1.85	R02627
EC:2.1.1.86	R04347
EC:2.1.1.90	R04384
EC:2.1.1.95	R07236
EC:2.1.1.95	R07504
EC:2.1.1.95	R10491
EC:2.1.1.95	R10492
EC:2.1.1.96	R02572
EC:2.1.1.98	R04481
EC:2.1.1.98	R08468
EC:2.1.1.98	R08469
EC:2.1.1.98	R10306
EC:2.1.2.1	R00945
EC:2.1.2.10	R04125
EC:2.1.2.11	R01226
EC:2.1.2.13	R07660
EC:2.1.2.2	R04325
EC:2.1.2.3	R04560
EC:2.1.2.5	R02287
EC:2.1.2.9	R03940
EC:2.1.3.1	R00930
EC:2.1.3.10	R08936
EC:2.1.3.11	R08937
EC:2.1.3.12	R06772
EC:2.1.3.15	R04386
EC:2.1.3.2	R01397
EC:2.1.3.3	R01398
EC:2.1.3.6	R01399
EC:2.1.3.7	R04281
EC:2.1.3.9	R07245
EC:2.1.4.1	R00565
EC:2.10.1.1	R09735
EC:2.2.1.1	R01641
EC:2.2.1.10	R08568
EC:2.2.1.11	R10049
EC:2.2.1.11	R10050
EC:2.2.1.12	R11141
EC:2.2.1.2	R08575
EC:2.2.1.3	R01440
EC:2.2.1.6	R00006
EC:2.2.1.7	R05636
EC:2.2.1.8	R07247
EC:2.2.1.9	R08165
EC:2.3.1.1	R00259
EC:2.3.1.101	R03390
EC:2.3.1.102	R03168
EC:2.3.1.107	R03230
EC:2.3.1.108	R04192
EC:2.3.1.109	R00832
EC:2.3.1.117	R04365
EC:2.3.1.118	R08386
EC:2.3.1.12	R02569
EC:2.3.1.122	R07248
EC:2.3.1.128	R04316
EC:2.3.1.129	R04567
EC:2.3.1.13	R00395
EC:2.3.1.133	R02416
EC:2.3.1.135	R04514
EC:2.3.1.136	R04484
EC:2.3.1.136	R07249
EC:2.3.1.137	R03779
EC:2.3.1.15	R00851
EC:2.3.1.158	R05333
EC:2.3.1.16	R00391
EC:2.3.1.162	R06307
EC:2.3.1.165	R07253
EC:2.3.1.168	R02662
EC:2.3.1.169	R08433
EC:2.3.1.17	R00487
EC:2.3.1.171	R07255
EC:2.3.1.174	R00829
EC:2.3.1.176	R03719
EC:2.3.1.178	R06978
EC:2.3.1.18	R02616
EC:2.3.1.180	R10707
EC:2.3.1.181	R07766
EC:2.3.1.182	R07399
EC:2.3.1.183	R08938
EC:2.3.1.184	R08940
EC:2.3.1.187	R08944
EC:2.3.1.188	R09106
EC:2.3.1.189	R09622
EC:2.3.1.19	R01174
EC:2.3.1.191	R04550
EC:2.3.1.192	R05841
EC:2.3.1.194	R09527
EC:2.3.1.196	R09528
EC:2.3.1.197	R09873
EC:2.3.1.198	R06872
EC:2.3.1.199	R10825
EC:2.3.1.20	R02251
EC:2.3.1.201	R10100
EC:2.3.1.202	R09842
EC:2.3.1.203	R10099
EC:2.3.1.207	R10172
EC:2.3.1.209	R10174
EC:2.3.1.21	R01923
EC:2.3.1.210	R10142
EC:2.3.1.22	R01368
EC:2.3.1.220	R02447
EC:2.3.1.221	R10239
EC:2.3.1.222	R00921
EC:2.3.1.223	R09839
EC:2.3.1.225	R10484
EC:2.3.1.227	R10514
EC:2.3.1.228	R10526
EC:2.3.1.229	R10529
EC:2.3.1.23	R01318
EC:2.3.1.231	R10587
EC:2.3.1.232	R10681
EC:2.3.1.233	R10965
EC:2.3.1.234	R10648
EC:2.3.1.235	R10960
EC:2.3.1.239	R06458
EC:2.3.1.24	R01496
EC:2.3.1.240	R06459
EC:2.3.1.241	R05146
EC:2.3.1.242	R10906
EC:2.3.1.243	R05075
EC:2.3.1.244	R11445
EC:2.3.1.245	R11182
EC:2.3.1.246	R06625
EC:2.3.1.247	R10564
EC:2.3.1.249	R11200
EC:2.3.1.250	R11201
EC:2.3.1.251	R11223
EC:2.3.1.26	R01461
EC:2.3.1.260	R11516
EC:2.3.1.261	R11615
EC:2.3.1.261	R11616
EC:2.3.1.263	R00399
EC:2.3.1.264	R11701
EC:2.3.1.265	R11781
EC:2.3.1.265	R11782
EC:2.3.1.28	R03065
EC:2.3.1.29	R00371
EC:2.3.1.30	R00586
EC:2.3.1.31	R01776
EC:2.3.1.35	R02282
EC:2.3.1.37	R00830
EC:2.3.1.39	R01626
EC:2.3.1.4	R02058
EC:2.3.1.40	R04864
EC:2.3.1.41	R02768
EC:2.3.1.42	R01013
EC:2.3.1.43	R02114
EC:2.3.1.45	R01807
EC:2.3.1.45	R01808
EC:2.3.1.46	R01777
EC:2.3.1.47	R03210
EC:2.3.1.5	R02387
EC:2.3.1.50	R01281
EC:2.3.1.51	R02241
EC:2.3.1.54	R00212
EC:2.3.1.57	R03910
EC:2.3.1.59	R03056
EC:2.3.1.6	R01023
EC:2.3.1.60	R03767
EC:2.3.1.61	R02570
EC:2.3.1.65	R03718
EC:2.3.1.67	R03437
EC:2.3.1.68	R00577
EC:2.3.1.7	R02396
EC:2.3.1.71	R02452
EC:2.3.1.74	R01613
EC:2.3.1.75	R01999
EC:2.3.1.76	R02366
EC:2.3.1.78	R04466
EC:2.3.1.78	R07815
EC:2.3.1.79	R01556
EC:2.3.1.79	R06251
EC:2.3.1.8	R00230
EC:2.3.1.80	R04950
EC:2.3.1.81	R04348
EC:2.3.1.82	R01889
EC:2.3.1.85	R05188
EC:2.3.1.86	R05190
EC:2.3.1.87	R03760
EC:2.3.1.89	R04364
EC:2.3.1.9	R00238
EC:2.3.1.94	R00918
EC:2.3.1.97	R03992
EC:2.3.2.10	R04613
EC:2.3.2.13	R03983
EC:2.3.2.15	R03956
EC:2.3.2.16	R08776
EC:2.3.2.17	R08777
EC:2.3.2.18	R08778
EC:2.3.2.2	R04159
EC:2.3.2.21	R10335
EC:2.3.2.22	R10336
EC:2.3.2.29	R11547
EC:2.3.2.29	R11548
EC:2.3.2.3	R03771
EC:2.3.2.30	R11801
EC:2.3.2.5	R04058
EC:2.3.2.6	R11443
EC:2.3.2.6	R11444
EC:2.3.2.8	R03862
EC:2.3.3.1	R00351
EC:2.3.3.10	R01978
EC:2.3.3.13	R01213
EC:2.3.3.14	R00271
EC:2.3.3.15	R05651
EC:2.3.3.5	R00931
EC:2.3.3.8	R00352
EC:2.3.3.9	R00472
EC:2.4.1.1	R01821
EC:2.4.1.1	R06050
EC:2.4.1.10	R05140
EC:2.4.1.10	R06079
EC:2.4.1.101	R05983
EC:2.4.1.102	R04575
EC:2.4.1.102	R05912
EC:2.4.1.109	R04072
EC:2.4.1.109	R07620
EC:2.4.1.109	R11399
EC:2.4.1.11	R00292
EC:2.4.1.11	R06051
EC:2.4.1.111	R02594
EC:2.4.1.117	R01005
EC:2.4.1.12	R02889
EC:2.4.1.12	R06023
EC:2.4.1.121	R03094
EC:2.4.1.122	R05908
EC:2.4.1.123	R01192
EC:2.4.1.123	R06214
EC:2.4.1.129	R06178
EC:2.4.1.129	R06179
EC:2.4.1.13	R07256
EC:2.4.1.131	R06127
EC:2.4.1.131	R06128
EC:2.4.1.132	R05002
EC:2.4.1.132	R05973
EC:2.4.1.133	R05926
EC:2.4.1.134	R05927
EC:2.4.1.135	R04607
EC:2.4.1.135	R05928
EC:2.4.1.14	R00766
EC:2.4.1.14	R06073
EC:2.4.1.141	R04494
EC:2.4.1.141	R05970
EC:2.4.1.142	R04502
EC:2.4.1.142	R05972
EC:2.4.1.143	R07258
EC:2.4.1.144	R07259
EC:2.4.1.145	R04662
EC:2.4.1.146	R04636
EC:2.4.1.146	R05901
EC:2.4.1.147	R05909
EC:2.4.1.149	R02789
EC:2.4.1.15	R00836
EC:2.4.1.15	R06043
EC:2.4.1.150	R11879
EC:2.4.1.152	R03519
EC:2.4.1.153	R01008
EC:2.4.1.155	R04665
EC:2.4.1.16	R02335
EC:2.4.1.16	R06028
EC:2.4.1.166	R00039
EC:2.4.1.166	R06139
EC:2.4.1.17	R09428
EC:2.4.1.173	R02113
EC:2.4.1.174	R05929
EC:2.4.1.175	R04603
EC:2.4.1.175	R05932
EC:2.4.1.18	R02110
EC:2.4.1.18	R06186
EC:2.4.1.180	R04477
EC:2.4.1.182	R04606
EC:2.4.1.183	R03996
EC:2.4.1.183	R06045
EC:2.4.1.184	R04472
EC:2.4.1.186	R03681
EC:2.4.1.187	R05566
EC:2.4.1.187	R06129
EC:2.4.1.195	R03213
EC:2.4.1.198	R02654
EC:2.4.1.198	R05916
EC:2.4.1.20	R00952
EC:2.4.1.20	R06056
EC:2.4.1.201	R04642
EC:2.4.1.206	R04493
EC:2.4.1.206	R05971
EC:2.4.1.208	R05164
EC:2.4.1.21	R02421
EC:2.4.1.21	R06049
EC:2.4.1.211	R05326
EC:2.4.1.211	R06057
EC:2.4.1.212	R05327
EC:2.4.1.212	R06068
EC:2.4.1.213	R05328
EC:2.4.1.214	R06015
EC:2.4.1.215	R07260
EC:2.4.1.216	R05767
EC:2.4.1.216	R06044
EC:2.4.1.217	R05768
EC:2.4.1.218	R05769
EC:2.4.1.22	R00503
EC:2.4.1.22	R06067
EC:2.4.1.221	R09295
EC:2.4.1.222	R09296
EC:2.4.1.223	R05930
EC:2.4.1.223	R07397
EC:2.4.1.224	R07334
EC:2.4.1.225	R07335
EC:2.4.1.226	R07336
EC:2.4.1.227	R05662
EC:2.4.1.227	R06173
EC:2.4.1.228	R03486
EC:2.4.1.228	R05960
EC:2.4.1.230	R07264
EC:2.4.1.231	R07265
EC:2.4.1.236	R07337
EC:2.4.1.241	R04469
EC:2.4.1.242	R07261
EC:2.4.1.245	R10525
EC:2.4.1.246	R08947
EC:2.4.1.247	R09632
EC:2.4.1.250	R09634
EC:2.4.1.251	R09734
EC:2.4.1.252	R09733
EC:2.4.1.255	R09676
EC:2.4.1.255	R09677
EC:2.4.1.256	R06264
EC:2.4.1.257	R06238
EC:2.4.1.258	R06258
EC:2.4.1.259	R06259
EC:2.4.1.260	R06260
EC:2.4.1.261	R06261
EC:2.4.1.263	R07575
EC:2.4.1.264	R09732
EC:2.4.1.265	R06263
EC:2.4.1.266	R09663
EC:2.4.1.267	R06262
EC:2.4.1.268	R09665
EC:2.4.1.271	R09757
EC:2.4.1.271	R09758
EC:2.4.1.271	R09759
EC:2.4.1.272	R09753
EC:2.4.1.274	R03354
EC:2.4.1.274	R06276
EC:2.4.1.275	R05977
EC:2.4.1.275	R09755
EC:2.4.1.276	R07574
EC:2.4.1.278	R05531
EC:2.4.1.279	R09941
EC:2.4.1.280	R09942
EC:2.4.1.281	R09943
EC:2.4.1.283	R08894
EC:2.4.1.284	R10096
EC:2.4.1.289	R10175
EC:2.4.1.290	R10188
EC:2.4.1.300	R10259
EC:2.4.1.301	R10424
EC:2.4.1.301	R10425
EC:2.4.1.301	R10426
EC:2.4.1.301	R10427
EC:2.4.1.303	R10432
EC:2.4.1.304	R10433
EC:2.4.1.305	R10434
EC:2.4.1.306	R10435
EC:2.4.1.308	R10439
EC:2.4.1.309	R10440
EC:2.4.1.310	R10594
EC:2.4.1.312	R10596
EC:2.4.1.313	R10620
EC:2.4.1.315	R04377
EC:2.4.1.315	R10807
EC:2.4.1.317	R06451
EC:2.4.1.32	R03829
EC:2.4.1.320	R10829
EC:2.4.1.321	R10832
EC:2.4.1.323	R10834
EC:2.4.1.324	R10835
EC:2.4.1.325	R10303
EC:2.4.1.329	R10987
EC:2.4.1.33	R08692
EC:2.4.1.330	R10988
EC:2.4.1.330	R10989
EC:2.4.1.330	R10990
EC:2.4.1.332	R11127
EC:2.4.1.335	R11224
EC:2.4.1.336	R02689
EC:2.4.1.337	R10850
EC:2.4.1.338	R11241
EC:2.4.1.339	R11398
EC:2.4.1.34	R03118
EC:2.4.1.34	R06020
EC:2.4.1.340	R11397
EC:2.4.1.342	R11530
EC:2.4.1.343	R11599
EC:2.4.1.345	R11702
EC:2.4.1.346	R11703
EC:2.4.1.346	R11704
EC:2.4.1.347	R11783
EC:2.4.1.348	R11937
EC:2.4.1.349	R11938
EC:2.4.1.37	R04548
EC:2.4.1.38	R04495
EC:2.4.1.4	R01823
EC:2.4.1.4	R06052
EC:2.4.1.40	R04423
EC:2.4.1.41	R02183
EC:2.4.1.43	R04343
EC:2.4.1.43	R06072
EC:2.4.1.44	R01997
EC:2.4.1.46	R02691
EC:2.4.1.47	R01500
EC:2.4.1.47	R06277
EC:2.4.1.5	R02120
EC:2.4.1.5	R06066
EC:2.4.1.50	R03380
EC:2.4.1.52	R04041
EC:2.4.1.56	R01996
EC:2.4.1.58	R01994
EC:2.4.1.60	R04581
EC:2.4.1.62	R04631
EC:2.4.1.62	R05941
EC:2.4.1.64	R02727
EC:2.4.1.64	R06053
EC:2.4.1.65	R04553
EC:2.4.1.66	R04491
EC:2.4.1.67	R03418
EC:2.4.1.67	R06042
EC:2.4.1.68	R05988
EC:2.4.1.69	R04081
EC:2.4.1.7	R00803
EC:2.4.1.7	R06034
EC:2.4.1.79	R05631
EC:2.4.1.79	R05962
EC:2.4.1.8	R01555
EC:2.4.1.8	R06040
EC:2.4.1.80	R01497
EC:2.4.1.80	R06275
EC:2.4.1.82	R02411
EC:2.4.1.82	R06071
EC:2.4.1.83	R01009
EC:2.4.1.86	R11714
EC:2.4.1.87	R02791
EC:2.4.1.88	R04182
EC:2.4.1.88	R05965
EC:2.4.1.9	R04194
EC:2.4.1.9	R06059
EC:2.4.1.90	R01205
EC:2.4.1.90	R06055
EC:2.4.1.92	R04584
EC:2.4.1.92	R05939
EC:2.4.2.1	R08368
EC:2.4.2.1	R10244
EC:2.4.2.10	R01870
EC:2.4.2.12	R01271
EC:2.4.2.14	R01072
EC:2.4.2.17	R01071
EC:2.4.2.18	R01073
EC:2.4.2.19	R03348
EC:2.4.2.2	R01570
EC:2.4.2.2	R01876
EC:2.4.2.2	R02484
EC:2.4.2.21	R04148
EC:2.4.2.22	R02142
EC:2.4.2.24	R03928
EC:2.4.2.24	R06083
EC:2.4.2.26	R05925
EC:2.4.2.28	R01402
EC:2.4.2.29	R03789
EC:2.4.2.29	R10209
EC:2.4.2.3	R01876
EC:2.4.2.30	R04176
EC:2.4.2.31	R00555
EC:2.4.2.36	R04074
EC:2.4.2.37	R03447
EC:2.4.2.38	R06016
EC:2.4.2.4	R01570
EC:2.4.2.43	R09773
EC:2.4.2.43	R09774
EC:2.4.2.43	R09781
EC:2.4.2.44	R09668
EC:2.4.2.45	R10095
EC:2.4.2.51	R10256
EC:2.4.2.52	R09675
EC:2.4.2.53	R07661
EC:2.4.2.54	R11102
EC:2.4.2.55	R10608
EC:2.4.2.57	R10836
EC:2.4.2.57	R10837
EC:2.4.2.57	R10838
EC:2.4.2.6	R04168
EC:2.4.2.7	R00190
EC:2.4.2.8	R01132
EC:2.4.2.9	R00966
EC:2.4.99.1	R04532
EC:2.4.99.1	R06188
EC:2.4.99.12	R04658
EC:2.4.99.13	R05074
EC:2.4.99.13	R06285
EC:2.4.99.14	R09763
EC:2.4.99.14	R09764
EC:2.4.99.15	R09765
EC:2.4.99.15	R09766
EC:2.4.99.16	R09994
EC:2.4.99.18	R04216
EC:2.4.99.20	R00119
EC:2.4.99.20	R10631
EC:2.4.99.20	R10632
EC:2.4.99.3	R05911
EC:2.4.99.4	R04590
EC:2.4.99.4	R05913
EC:2.4.99.6	R04596
EC:2.4.99.6	R09297
EC:2.4.99.7	R04635
EC:2.4.99.8	R04564
EC:2.4.99.9	R03488
EC:2.4.99.9	R05937
EC:2.5.1.1	R01658
EC:2.5.1.10	R02003
EC:2.5.1.101	R10304
EC:2.5.1.103	R00702
EC:2.5.1.105	R10339
EC:2.5.1.108	R10455
EC:2.5.1.109	R10456
EC:2.5.1.112	R08051
EC:2.5.1.112	R08052
EC:2.5.1.113	R10610
EC:2.5.1.114	R10611
EC:2.5.1.115	R07500
EC:2.5.1.116	R10708
EC:2.5.1.117	R08782
EC:2.5.1.120	R10667
EC:2.5.1.128	R11154
EC:2.5.1.128	R11159
EC:2.5.1.128	R11160
EC:2.5.1.129	R11225
EC:2.5.1.131	R11040
EC:2.5.1.132	R11439
EC:2.5.1.133	R11514
EC:2.5.1.134	R10305
EC:2.5.1.140	R11705
EC:2.5.1.141	R07411
EC:2.5.1.15	R03067
EC:2.5.1.16	R01920
EC:2.5.1.17	R05220
EC:2.5.1.17	R07268
EC:2.5.1.18	R03522
EC:2.5.1.18	R08511
EC:2.5.1.18	R08512
EC:2.5.1.19	R03460
EC:2.5.1.2	R02863
EC:2.5.1.21	R00702
EC:2.5.1.21	R02872
EC:2.5.1.21	R06223
EC:2.5.1.22	R02869
EC:2.5.1.26	R04311
EC:2.5.1.27	R04038
EC:2.5.1.29	R02061
EC:2.5.1.3	R03223
EC:2.5.1.3	R10712
EC:2.5.1.3	R11312
[truncated: 1,887 more rows]
